# Supplementary material for: Developmental Plasticity of the Major Alkyl Cannabinoid Chemotypes in a Diverse Cannabis Genetic Resource Collection
Source: Front Plant Sci. 2018 Oct 23;9:1510. doi: 10.3389/fpls.2018.01510 (PMC6206272; doi:10.3389/fpls.2018.01510)
Supplement: Supplementary file 3 [file Table_2.xlsx]

## Sheet: Supplementary Table S2
Supplementary Table S2 Cannabinoid values for 99 Cannabisplants at three developmental stages
	Vegetative growth stage																		Flowering growth stage																		Maturation growth stage
	Fresh weight (% w/w)										Qualitative fraction (% total)								Fresh weight (% w/w)										Qualitative fraction (% total)								Dry weight (% w/w)										Qualitative fraction (% total)
	THCA		CBDA		THCVA		CBDVA		Total		Dicyclic		Tricyclic		C3 alkyl		C5 alkyl		THCA		CBDA		THCVA		CBDVA		Total		Dicyclic		Tricyclic		C3 alkyl		C5 alkyl		THCA		CBDA		THCVA		CBDVA		Total		Dicyclic		Tricyclic
Plant ID	MEAN	STDEV	MEAN	STDEV	MEAN	STDEV	MEAN	STDEV	MEAN	STDEV	MEAN	STDEV	MEAN	STDEV	MEAN	STDEV	MEAN	STDEV	MEAN	STDEV	MEAN	STDEV	MEAN	STDEV	MEAN	STDEV	MEAN	STDEV	MEAN	STDEV	MEAN	STDEV	MEAN	STDEV	MEAN	STDEV	MEAN	STDEV	MEAN	STDEV	MEAN	STDEV	MEAN	STDEV	MEAN	STDEV	MEAN	STDEV	MEAN
A02	0.0305442	0.0108666	8.9268e-05	2.87224e-05	0.000502782	0.000174861	0	0	0.0311362	0.0110702	0.288539	0.0103398	99.7115	0.0103398	1.61716	0.0133648	98.3828	0.0133648	0.157976	0.0852232	0.000329572	0.00015625	0.00231342	0.00112481	0	0	0.160619	0.0865042	0.209355	0.0154718	99.7906	0.0154718	1.46407	0.088204	98.5359	0.088204	2.315	0.0665163	0.00625981	0.000248987	0.0178738	9.05e-05	0	0	2.33914	0.0666748	0.267569	0.00301763	99.7324
A03	0.0305834	0.00958881	8.83526e-05	1.79383e-05	0.000367849	8.29517e-05	0	0	0.0310396	0.0096897	0.289742	0.0326579	99.7103	0.0326579	1.20195	0.10797	98.7981	0.10797	0.046939	0.0121181	0.000124143	2.95854e-05	0.000561381	0.000175804	0	0	0.0476246	0.0123235	0.261383	0.00551443	99.7386	0.00551443	1.17018	0.0663444	98.8298	0.0663444	1.49482	0.00108117	0.00357541	0.000651113	0.0100901	0.000497423	0	0	1.50848	0.0022297	0.236989	0.0428131	99.763
A08	0.030444	0.00720426	7.56887e-05	1.46567e-05	0.000405407	6.4925e-05	0	0	0.0309251	0.00728384	0.245991	0.0105443	99.754	0.0105443	1.3229	0.101643	98.6771	0.101643	0.179876	0.0125733	0.000411683	3.50157e-05	0.00223934	4.94831e-05	0	0	0.182527	0.0126578	0.225423	0.00355125	99.7746	0.00355125	1.22887	0.0581094	98.7711	0.0581094	1.99325	0.0149925	0.00559363	0.000141033	0.0117644	0.000195298	0.000442381	5.49995e-06	2.01105	0.0149437	0.300123	0.00505621	99.6999
B01	0.0164368	0.0064907	5.04922e-05	4.15087e-05	0.022712	0.00643101	0.000101306	1.47446e-05	0.0393006	0.012978	0.383528	0.0164861	99.6165	0.0164861	58.5315	2.92731	41.4685	2.92731	0.0187228	0.00765145	6.0547e-05	1.1824e-05	0.0212247	0.00845127	9.86487e-05	3.01085e-05	0.0401067	0.0161446	0.409027	0.0600982	99.591	0.0600982	53.2224	0.277241	46.7776	0.277241	0.442385	0.00115399	0.00148496	2.04029e-05	0.523479	0.000753529	0.00459519	6.86144e-05	0.971945	0.00195573	0.625562	0.00370156	99.3744
B02	0.00713101	0.00325852	3.04768e-05	1.21476e-05	0.0498766	0.0139242	0.000217438	4.0478e-05	0.0572555	0.0172354	0.439057	0.040254	99.5609	0.040254	87.799	2.03959	12.201	2.03959	0.0173067	0.00279875	5.09634e-05	1.23625e-05	0.0635818	0.0105259	0.000334786	5.1524e-05	0.0812743	0.0077663	0.474491	0.00284359	99.5255	0.00284359	78.3791	5.52482	21.6209	5.52482	0.332262	0.0108897	0.00124086	0.000123942	0.815793	0.0266301	0.0139105	0.000251171	1.16321	0.0378949	1.30272	0.0101917	98.6973
B09	0.0172851	0.00419352	6.10736e-05	1.09028e-05	0.0562113	0.00498996	0.000225628	3.19789e-05	0.0737832	0.00922636	0.387973	0.00960376	99.612	0.00960376	76.6641	2.78027	23.3359	2.78027	0.0170626	0.00308746	4.70956e-05	1.97583e-05	0.0472383	0.0123624	0.00026285	3.13695e-05	0.0646109	0.0093261	0.47899	0.00999322	99.521	0.00999322	72.8938	8.66054	27.1062	8.66054	0.277651	0.00434105	0.00113752	6.62128e-05	0.680383	0.00354199	0.0131536	2.75763e-05	0.972325	0.00797683	1.4698	0.00241216	98.5302
B10	0.0241645	0.00291849	7.60121e-05	9.62798e-06	0.0919927	0.0059704	0.000407665	2.25899e-05	0.116641	0.00892111	0.414829	0.00410617	99.5852	0.00410617	79.2532	0.923581	20.7468	0.923581	0.0145503	0.00118913	4.72363e-05	6.03318e-06	0.0652803	0.00567222	0.000414475	6.56828e-05	0.0802923	0.00693307	0.573319	0.0398138	99.4267	0.0398138	81.816	0.0816299	18.184	0.0816299	0.281551	0.00982905	0.00082632	0.000146075	0.754198	0.0197716	0.0246978	0.000621681	1.06127	0.0303684	2.405	0.00352365	97.595
C02	0.0217602	0.00260802	5.16451e-05	2.51125e-05	0.00262058	0.000377552	1.66157e-05	1.0408e-05	0.024449	0.00302109	0.272299	0.111637	99.7277	0.111637	10.7707	0.255909	89.2293	0.255909	0.0256497	0.00502012	7.45779e-05	1.33452e-05	0.00441451	0.00125189	3.10827e-05	3.53661e-06	0.0301699	0.00628182	0.35452	0.0413051	99.6455	0.0413051	14.6214	1.09336	85.3786	1.09336	0.450777	0.00587765	0.00120945	0.000146753	0.0608801	0.00108582	0.00103369	0.000173126	0.5139	0.00698984	0.436498	0.000805033	99.5635
C04	0.017998	0.000449638	4.17587e-05	2.04257e-05	0.00286362	6.0451e-05	0	0	0.0209034	0.000409613	0.198851	0.093818	99.8011	0.093818	13.7047	0.557743	86.2953	0.557743	0.0103148	0.00364497	1.85277e-05	6.43019e-06	0.00201594	0.000980491	3.4203e-05	1.48488e-05	0.0123835	0.00461705	0.471241	0.243679	99.5288	0.243679	16.2298	1.74672	83.7702	1.74672	0.34696	0.00632841	0.00103638	0.000240821	0.0474614	0.00075572	0.000505509	2.27605e-05	0.395963	0.00730219	0.38896	0.047898	99.611
C07	0.0259644	0.00195756	6.84583e-05	9.61834e-06	0.00604178	0.000512159	0	0	0.0320746	0.00247934	0.212911	0.0135295	99.7871	0.0135295	18.8312	0.141139	81.1688	0.141139	0.0261329	0.0058504	6.86314e-05	2.80816e-05	0.00764481	0.0012696	5.00979e-05	1.32903e-05	0.0338964	0.00716138	0.345079	0.0491483	99.6549	0.0491483	22.8105	1.03449	77.1895	1.03449	0.412415	0.00695908	0.00118671	0.000142617	0.0734397	0.000567235	0.00100633	0.00020905	0.488048	0.00745988	0.449507	0.0204828	99.5505
C08	0.0242889	0.000762971	0.000102962	3.08692e-05	0.0052089	0.000225338	3.22187e-05	5.79071e-06	0.029633	0.000951649	0.458406	0.138435	99.5416	0.138435	17.684	0.172976	82.316	0.172976	0.0167537	0.000623771	3.33606e-05	2.32427e-05	0.0046341	8.12025e-05	0	0	0.0214211	0.000565812	0.154358	0.104426	99.8456	0.104426	21.6458	0.950823	78.3542	0.950823	0.355884	0.00139474	0.00097183	9.684e-05	0.0596387	0.000517378	0.000372531	0.000125912	0.416867	0.00194119	0.322479	0.00547227	99.6775
C11	0.0271193	0.00324828	6.07907e-05	4.92699e-06	0.00399229	0.000460718	0	0	0.0311724	0.00371393	0.19546	0.00748181	99.8045	0.00748181	12.81	0.048236	87.19	0.048236	0.0174891	0.00433183	5.10033e-05	1.73506e-05	0.00318971	0.00104753	0	0	0.0207299	0.0053967	0.243391	0.0203353	99.7566	0.0203353	15.2459	1.08418	84.7541	1.08418	0.608193	0.00384317	0.00176784	8.93059e-05	0.0869014	0.000167931	0.00103098	1.04642e-05	0.697894	0.00391133	0.401084	0.0165438	99.5989
D03	0.0384053	0.00169242	0.000125649	1.36292e-06	0.00256634	9.11906e-05	3.46155e-05	2.91864e-06	0.0411319	0.00177933	0.390226	0.0272902	99.6098	0.0272902	6.32473	0.0589951	93.6753	0.0589951	0.034733	0.0268989	0.00012796	5.95273e-05	0.00244006	0.00171907	0	0	0.037301	0.0286775	0.399879	0.147846	99.6001	0.147846	6.77106	0.597051	93.2289	0.597051	0.949771	0.0143486	0.00285633	9.60658e-05	0.0765171	0.00141589	0.00109173	0.000161157	1.03024	0.01319	0.38309	0.0200627	99.6169
D06	0.0198719	0.00578566	0.0265735	0.00744047	0.00102669	0.000573827	0.000805719	0.000243451	0.0482777	0.0140434	56.8	0.606351	43.2	0.606351	3.70614	0.614795	96.2939	0.614795	0.0144	0.00501379	0.0194131	0.0060396	0.000676015	1.09022e-05	0.000339687	2.27807e-05	0.0348288	0.0110197	56.8253	0.703909	43.1747	0.703909	3.08604	1.07312	96.914	1.07312	0.543103	0.000371655	0.754978	0.00371667	0.02301	0.000299701	0.0195169	0.000475109	1.34061	0.00411983	57.7717	0.135139	42.2283
D12	0.0259344	0.00472945	0.00015143	2.91146e-05	0.000845408	0.000108758	0	0	0.0269312	0.0048091	0.581202	0.211892	99.4188	0.211892	3.15336	0.159259	96.8466	0.159259	0.0230541	0.0124514	0.000167481	5.1249e-07	0.000815325	0.000426517	2.486e-05	2.60826e-06	0.0240617	0.0128748	0.936965	0.514317	99.063	0.514317	3.52508	0.124427	96.4749	0.124427	0.735947	0.0061754	0.00241134	8.24786e-05	0.0235312	4.28832e-05	0.00105441	0.00010065	0.762944	0.00615069	0.454265	0.00128046	99.5457
E03	0.00203269	0.000586242	0.00231107	0.000523338	0.0205022	0.00506909	0.0135934	0.00352372	0.0384393	0.00970239	41.3643	0.0877563	58.6357	0.0877563	88.7042	0.0354152	11.2958	0.0354152	0.00129898	0.000157848	0.00238304	5.05512e-05	0.0136281	0.000136756	0.0147111	0.000499515	0.0320212	0.000528974	53.3768	0.83606	46.6232	0.83606	88.497	0.525104	11.503	0.525104	0.0947939	4.44265e-05	0.115858	0.000912431	0.888692	0.00566561	0.624067	0.00222125	1.72341	0.00701886	42.934	0.0989114	57.066
E04	0.000165954	1.23259e-05	0.00297618	0.000248322	0.0014581	0.00020692	0.0216105	0.00205729	0.0262108	0.00252486	93.8155	0.240719	6.18454	0.240719	88.0043	0.161106	11.9957	0.161106	0.000219792	3.0821e-06	0.00212307	0.000123054	0.00102115	0.000223116	0.0111583	0.00160713	0.0145223	0.00195022	91.4798	0.370958	8.52017	0.370958	83.7763	1.35257	16.2237	1.35257	0.015639	0.000827717	0.231177	0.000585365	0.0763571	0.00295462	1.28607	0.0224925	1.60924	0.0268602	94.2844	0.139638	5.71557
E09	0.00189067	0.000398562	0.00498364	0.000786502	0.011093	0.00196299	0.0177885	0.00276919	0.0357558	0.00591724	63.7379	0.603631	36.2621	0.603631	80.7854	0.134492	19.2146	0.134492	0.0011869	0.000496701	0.0034552	0.00117638	0.00685971	0.00203749	0.0119125	0.00365593	0.0234143	0.0073665	65.6356	0.0117165	34.3644	0.0117165	80.3244	0.955285	19.6756	0.955285	0.0591483	0.00040537	0.174588	0.000220577	0.389702	0.00241763	0.638642	0.00423795	1.26208	0.00647079	64.4356	0.0229016	35.5644
E10	7.23017e-05	8.41174e-06	0.0011454	0.000117393	0.000758541	8.2121e-05	0.0120597	0.00131756	0.0140359	0.00152549	94.0807	0.00166983	5.91931	0.00166983	91.3218	0.0468787	8.67817	0.0468787	0	0	0.0010709	0.000359812	0.000860948	0.000101449	0.0102334	0.000659382	0.0121652	0.00112064	92.9313	0.182766	7.06871	0.182766	91.2963	2.15594	8.70369	2.15594	0.00842863	0.000386713	0.124069	0.00118043	0.0449544	2.98297e-05	0.766937	0.00609665	0.944388	0.0069202	94.3471	0.079213	5.65294
E11	0.00033171	8.74478e-06	0.00676046	0.000695406	0.00139517	0.000183713	0.023553	0.0033343	0.0320403	0.00420467	94.5996	0.162608	5.40037	0.162608	77.8144	0.768309	22.1856	0.768309	0.000538586	0.000280004	0.00489397	0.00187968	0.00165204	0.00107293	0.0172156	0.00877189	0.0243002	0.0120045	91.2986	1.26902	8.70141	1.26902	77.0373	2.45629	22.9627	2.45629	0.0238124	0.00158977	0.484618	0.00206862	0.0909923	0.000347639	1.64636	0.0113811	2.24578	0.0146918	94.8881	0.0218673	5.11194
F03	0.0251689	0.00197215	8.88354e-05	1.57048e-05	0.000281957	2.0048e-05	0	0	0.0255397	0.00197649	0.351263	0.0886754	99.6487	0.0886754	1.10426	0.00696034	98.8957	0.00696034	0.0220833	0.00302975	0.000134968	9.29626e-05	0.000230169	4.1706e-06	0	0	0.0224484	0.00311854	0.578048	0.333814	99.422	0.333814	1.03662	0.162586	98.9634	0.162586	0.727106	0.00652872	0.0037013	0.000196657	0.00552087	0.000454005	0	0	0.736328	0.00678607	0.502814	0.0313418	99.4972
F04	0.0327483	0.00145764	0.000121825	3.277e-05	0.000246259	4.1978e-06	0	0	0.0331164	0.00148621	0.366017	0.0825277	99.634	0.0825277	0.744649	0.0460946	99.2554	0.0460946	0.0408221	0.00174911	0.000520266	0.000383025	0.000302797	3.29907e-05	0	0	0.0416452	0.00139907	1.26545	0.962248	98.7346	0.962248	0.726168	0.0548229	99.2738	0.0548229	1.00598	0.0159578	0.00486148	0.000164651	0.00486349	0.000142469	0	0	1.01571	0.0162649	0.47856	0.00854708	99.5214
F10	0.0261539	0.00141912	6.34089e-05	3.5031e-05	0.000288796	3.61145e-05	0	0	0.0265061	0.00149026	0.235881	0.1189	99.7641	0.1189	1.08744	0.0751107	98.9126	0.0751107	0.0168417	0.00365661	8.62481e-05	4.98744e-05	0.000155768	6.95545e-05	0	0	0.0170837	0.00377604	0.484424	0.184868	99.5156	0.184868	0.8885	0.210752	99.1115	0.210752	1.20824	0.0014851	0.00342621	0.000188395	0.00597464	6.71456e-05	0	0	1.21764	0.00174064	0.28137	0.0150699	99.7186
F12	0.0504707	0.00159903	0.000156381	1.79169e-05	0.000638796	5.07172e-05	0	0	0.0512658	0.00163183	0.30575	0.0446812	99.6943	0.0446812	1.2451	0.0592974	98.7549	0.0592974	0.0434898	0.00728396	0.000153389	5.72056e-05	0.000550881	7.52467e-05	0	0	0.0441941	0.00741641	0.34102	0.0722136	99.659	0.0722136	1.24982	0.0394733	98.7502	0.0394733	1.11685	0.00411997	0.00347718	9.41754e-05	0.00840081	3.78084e-05	0	0	1.12873	0.00406361	0.30808	0.00945266	99.6919
F13	0.0298299	0.00258435	0.000101449	1.40454e-05	0.000168132	4.66885e-05	0	0	0.0300995	0.00264508	0.336292	0.0171105	99.6637	0.0171105	0.55391	0.106437	99.4461	0.106437	0.0426391	0.00323684	0.000213152	1.15817e-05	0.00027806	2.86174e-05	0	0	0.0431303	0.00327704	0.494613	0.010728	99.5054	0.010728	0.644037	0.0174171	99.356	0.0174171	1.44632	0.00908833	0.00451331	6.77878e-05	0.00643747	6.46781e-05	0	0	1.45727	0.00895587	0.309729	0.00655518	99.6903
G04	0.0146014	0.000553376	0.0162875	1.83664e-05	0.00992505	0.000904213	0.0061877	0.000526373	0.0470016	0.00200233	47.8366	0.878922	52.1634	0.878922	34.2475	1.58471	65.7525	1.58471	0.00792169	8.56459e-05	0.00904217	0.000138671	0.00385031	0.000192694	0.00212045	0.000255538	0.0229346	0.000501257	48.6643	0.655235	51.3357	0.655235	26.0187	1.38573	73.9813	1.38573	0.622289	0.00430211	0.812076	0.0095013	0.475105	0.00564928	0.374558	0.00303441	2.28403	0.0224871	51.9534	0.0373422	48.0466
G05	0.0218442	0.00316189	0.000101579	1.23298e-05	0.0111566	0.00148465	8.62001e-05	1.68759e-05	0.0331886	0.00467574	0.565203	0.00837133	99.4348	0.00837133	33.8933	0.250802	66.1067	0.250802	0.018089	0.00294501	8.45663e-05	8.13703e-06	0.00605083	0.000653164	5.275e-05	7.67062e-06	0.0242771	0.00361398	0.567057	0.0193008	99.4329	0.0193008	25.2181	1.03202	74.7819	1.03202	0.586914	0.00523844	0.00428897	0.000417582	0.265653	0.000751497	0.00320722	9.16203e-05	0.860064	0.00548073	0.871792	0.0647607	99.1282
G06	0.0052413	0.000302228	0.00525705	0.000327624	0.0134085	0.000683169	0.00789498	0.00051207	0.0318018	0.00182509	41.3485	0.267426	58.6515	0.267426	66.9907	0.0861669	33.0093	0.0861669	0.00300173	0.000227448	0.00354853	0.000299521	0.00652698	0.000891991	0.00447528	0.000526467	0.0175525	0.00194543	45.7332	0.363019	54.2668	0.363019	62.6187	1.1409	37.3813	1.1409	0.199553	0.00438168	0.216374	0.00196827	0.399811	0.00622641	0.278233	0.00268065	1.09397	0.015257	45.2135	0.20561	54.7865
G07	0.0119365	0.000571735	5.96125e-05	9.90008e-06	0.0223578	0.00122401	0.00020964	2.81935e-05	0.0345635	0.00181404	0.778691	0.0120582	99.2213	0.0120582	65.2874	0.196347	34.7126	0.196347	0.00956083	0.00107004	0.000157059	6.19694e-05	0.0169028	0.000961067	9.58391e-05	6.15497e-06	0.0267166	0.00197529	0.956937	0.279665	99.0431	0.279665	63.6661	1.08685	36.3339	1.08685	0.476243	0.000305829	0.00328887	0.000302881	0.872825	0.00148062	0.00704606	4.737e-05	1.3594	0.000919282	0.760261	0.01931	99.2397
G08	0.0179657	0.00244265	0.0105975	0.00160696	0.00280027	0.000398553	0.000870839	0.000136328	0.0322343	0.00458449	35.5531	0.351687	64.4469	0.351687	11.386	0.039994	88.614	0.039994	0.0185575	0.00184803	0.0132738	0.00107356	0.00249147	0.000127689	0.00076306	1.06922e-05	0.0350859	0.00303859	40.0261	0.437093	59.9739	0.437093	9.29632	0.471645	90.7037	0.471645	0.503946	0.00132754	0.318078	0.000808987	0.0569511	0.000966336	0.0214505	0.000278185	0.900426	0.00144837	37.7075	0.0600857	62.2925
G14	0.00844259	0.000300279	0.00772767	0.000245253	0.00452617	0.000536936	0.00217618	0.000261793	0.0228726	0.00134426	43.3097	0.328555	56.6903	0.328555	29.2508	1.77296	70.7492	1.77296	0.00623481	0.000232098	0.00639543	0.000861246	0.00227043	0.000666554	0.00117916	0.000483977	0.0160798	0.00224388	46.9799	1.81005	53.0201	1.81005	21.1597	4.20237	78.8403	4.20237	0.205913	0.00185477	0.199503	0.000691188	0.092717	0.000624412	0.0591874	0.000341184	0.55732	0.00226273	46.4169	0.00321468	53.5831
I02	0.0777354	0.0141291	0.000227545	3.60416e-05	0.00116227	0.000147498	0	0	0.0791252	0.0143126	0.288171	0.00657582	99.7118	0.00657582	1.47619	0.0806104	98.5238	0.0806104	0.0814	0.0349829	0.000192431	7.69433e-05	0.00177303	0.000955378	0	0	0.0833655	0.0360153	0.232597	0.00818925	99.7674	0.00818925	2.07268	0.250578	97.9273	0.250578	0.984366	0.00159262	0.00285097	0.00013214	0.0276208	0.000481307	0	0	1.01484	0.000979171	0.280935	0.0132918	99.7191
I06	0.106989	0.0201662	0.000281755	5.29514e-05	0.00114769	0.000213615	0	0	0.108419	0.0204328	0.25989	0.000139579	99.7401	0.000139579	1.05881	0.00251779	98.9412	0.00251779	0.0908141	0.0232259	0.00022123	4.17606e-05	0.00105539	0.000325315	0	0	0.0920907	0.023593	0.242375	0.0167475	99.7576	0.0167475	1.13814	0.0616717	98.8619	0.0616717	6.77491	0.0450243	0.0176551	0.000341241	0.0448386	0.000314605	0.00143958	1.35125e-05	6.83884	0.0456937	0.279198	0.00332188	99.7208
I08	0.222677	0.0353226	0.000569052	9.49951e-05	0.00173358	0.000336706	4.96897e-05	2.6833e-05	0.225029	0.0357275	0.276035	0.0135353	99.724	0.0135353	0.791503	0.0120381	99.2085	0.0120381	0.141204	0.0118104	0.000290673	1.27832e-05	0.00120833	9.0509e-05	0	0	0.142703	0.0119136	0.204028	0.00807557	99.796	0.00807557	0.847052	0.00729196	99.1529	0.00729196	1.30562	0.013217	0.00363446	0.000281753	0.0089465	0.000346669	0.000306772	4.9683e-05	1.31851	0.0138951	0.298801	0.0219883	99.7012
I09	0.121695	0.00150907	0.000323561	5.6774e-06	0.00189146	3.83067e-05	1.11268e-05	7.3056e-06	0.123921	0.00154575	0.270112	0.00468318	99.7299	0.00468318	1.53529	0.00586624	98.4647	0.00586624	0.159389	0.0149784	0.000325321	3.8914e-05	0.00275271	0.000234332	0	0	0.162467	0.0152517	0.199995	0.00517733	99.8	0.00517733	1.69502	0.0148871	98.305	0.0148871	3.30021	0.10507	0.00841697	3.47123e-06	0.0952739	0.00276092	0.000890229	0.000106311	3.40479	0.107934	0.273445	0.00564797	99.7266
I12	0.255828	0.00395908	0.000566794	2.35095e-06	0.00325225	7.85341e-05	1.84286e-05	1.01954e-05	0.259666	0.00405016	0.225365	0.00131656	99.7746	0.00131656	1.25946	0.0145261	98.7405	0.0145261	0.10849	0.00551653	0.000235508	3.44152e-05	0.00131093	0.000145778	0	0	0.110036	0.00569672	0.213504	0.0202228	99.7865	0.0202228	1.18952	0.0708985	98.8105	0.0708985	3.26304	0.0180016	0.00887417	8.95612e-05	0.0289318	0.000260668	0.000825974	7.80644e-05	3.30167	0.0177524	0.293798	0.00123148	99.7062
I16	0.199574	0.0290688	0.000443049	5.46196e-05	0.00421296	0.000526032	0	0	0.20423	0.0296494	0.217285	0.00480052	99.7827	0.00480052	2.06593	0.042356	97.9341	0.042356	0.128951	0.00899276	0.000309508	1.29703e-05	0.00266963	4.201e-05	0	0	0.13193	0.00904774	0.234815	0.00627234	99.7652	0.00627234	2.02719	0.107182	97.9728	0.107182	2.21054	0.025609	0.00532533	8.96657e-05	0.100823	0.000382297	0.000970668	6.11065e-05	2.31766	0.0258405	0.271706	0.00953474	99.7283
J01	0.0451436	0.00600815	0.000151307	3.32064e-05	0.00138953	0.000224195	0	0	0.0466845	0.00626555	0.322234	0.0278822	99.6778	0.0278822	2.97096	0.0814995	97.029	0.0814995	0.0543095	0.01169	0.000308743	0.000187913	0.00189128	0.000443608	0	0	0.0565096	0.0119457	0.594793	0.458267	99.4052	0.458267	3.33844	0.0792894	96.6616	0.0792894	1.317	0.00618455	0.0102614	2.14808e-05	0.103439	0.000594728	0.00101651	0.000205659	1.43172	0.00581697	0.787698	0.0126645	99.2123
J02	0.00172124	0.000164511	0.0305899	0.00394553	7.81205e-05	5.47718e-06	0.000442238	9.45698e-05	0.0328315	0.00419913	94.5055	0.218357	5.49455	0.218357	1.58051	0.0692171	98.4195	0.0692171	0.00276334	0.00110011	0.0415473	0.0175112	0.000121755	5.9034e-05	0.000500924	0.000226594	0.0449333	0.018897	93.5513	0.132314	6.44866	0.132314	1.37359	0.0579976	98.6264	0.0579976	0.0677922	0.000721024	0.983215	0.00633185	0.00300478	6.169e-05	0.0432776	0.000960054	1.09729	0.00795124	93.5481	0.0133352	6.45193
J06	0.0439702	0.00399011	0.000176101	1.57059e-05	0.00153916	0.000134635	0	0	0.0456855	0.00414045	0.38549	0.000558351	99.6145	0.000558351	3.36952	0.0106791	96.6305	0.0106791	0.0309437	0.00193303	0.00014501	3.37514e-06	0.00094705	0.000305033	0	0	0.0320357	0.00224144	0.453393	0.0211869	99.5466	0.0211869	2.93009	0.747156	97.0699	0.747156	0.612645	0.00713198	0.00419927	1.04345e-05	0.0116483	0.000263174	4.70728e-05	1.39612e-05	0.62854	0.00687233	0.675626	0.00682606	99.3244
J08	0.0123868	0.00186106	0.0184055	0.00225844	0.000672371	5.19381e-05	0.000525407	8.3424e-06	0.0319901	0.00417978	59.22	0.651702	40.78	0.651702	3.76403	0.303368	96.236	0.303368	0.0155306	0.000411512	0.0241524	0.00127258	0.000793361	3.14174e-05	0.00043343	0.000104234	0.0409097	0.000933889	60.0749	1.99411	39.9251	1.99411	2.99752	0.109567	97.0025	0.109567	0.172345	0.00209379	0.260259	0.00247715	0.0106858	0.000445019	0.012298	1.13652e-05	0.455587	0.00413729	59.8253	0.00293501	40.1747
J09	0.0657347	0.00498758	0.00021894	1.92935e-05	0.00566882	0.000715614	3.2839e-05	3.6298e-06	0.0716553	0.00571886	0.351623	0.00620343	99.6484	0.00620343	7.94271	0.35971	92.0573	0.35971	0.0647197	0.0207377	0.00028066	7.69648e-05	0.00390328	0.0013466	0	0	0.0689037	0.0221613	0.410596	0.0203598	99.5894	0.0203598	5.64239	0.13957	94.3576	0.13957	0.715175	0.0303883	0.00431862	0.000135751	0.0444238	0.00207099	0.000654882	0.000311909	0.764572	0.0320116	0.652292	0.085861	99.3477
J13	0.0130865	0.00133229	0.0201109	0.00247058	0.000723981	0.000160537	0.000646627	0.000160233	0.034568	0.00412364	60.0214	0.450551	39.9786	0.450551	3.93764	0.458216	96.0624	0.458216	0.0206776	0.000364518	0.0321882	0.000146829	0.000948444	4.73436e-06	0.000629389	1.79726e-05	0.0544437	0.00048864	60.2795	0.304339	39.7205	0.304339	2.8984	0.0677208	97.1016	0.0677208	0.153889	0.00103886	0.189919	0.0010859	0.00412238	0.000293808	0.00283294	8.42079e-06	0.350763	0.00241015	54.9523	0.0704048	45.0477
K02	0.0539102	0.00678308	0.000176649	1.16207e-05	0.00364575	0.000723705	0	0	0.0577326	0.0075184	0.307273	0.0198871	99.6927	0.0198871	6.28657	0.434859	93.7134	0.434859	0.0618726	0.0051395	0.000174347	1.76022e-05	0.0037738	0.000627606	0	0	0.0658207	0.00578471	0.264728	0.00347685	99.7353	0.00347685	5.71362	0.451363	94.2864	0.451363	0.673695	0.00453107	0.001997	0.000107285	0.0491238	8.38491e-05	0.000599043	0.000401182	0.725415	0.00432102	0.357997	0.0426467	99.642
K03	0.0112211	0.00353255	0.0177642	0.00810587	0.00128246	0.000678824	0.00113765	0.000697259	0.0314055	0.0130145	59.4864	3.37926	40.5136	3.37926	7.43667	1.29989	92.5633	1.29989	0.0532889	0.0116174	0.0897678	0.0234342	0.00447294	0.00119317	0.00342742	0.00106629	0.150957	0.0373111	61.6125	1.00174	38.3875	1.00174	5.20761	0.209623	94.7924	0.209623	0.119798	0.000780294	0.197675	0.00116415	0.0121514	0.000272239	0.0145228	0.000179686	0.344146	0.00185189	61.6589	0.0586901	38.3411
K09	0.0160646	0.00250597	6.24246e-05	2.19466e-05	0.000637867	7.91243e-05	0	0	0.0167649	0.00260704	0.366608	0.0738987	99.6334	0.0738987	3.8142	0.121168	96.1858	0.121168	0.0263891	0.00894401	0.00015599	1.78778e-05	0.000822074	8.64758e-05	0	0	0.0273672	0.00904836	0.591519	0.130247	99.4085	0.130247	3.12228	0.716331	96.8777	0.716331	0.41974	0.00159143	0.00122633	0.000144785	0.011691	0.000119312	0.000658464	0.000408327	0.433316	0.00197428	0.434836	0.0588387	99.5652
K10	0.0206807	0.00202634	8.43854e-05	2.37442e-05	0.0015941	0.00023948	0	0	0.0223592	0.00228956	0.373932	0.0679043	99.6261	0.0679043	7.11197	0.342801	92.888	0.342801	0.0621028	0.00149297	0.000231106	3.57608e-05	0.00439369	0.000195882	6.70129e-05	4.0818e-05	0.0667946	0.00168379	0.446558	0.0188283	99.5534	0.0188283	6.67744	0.0638227	93.3226	0.0638227	0.389938	0.0051614	0.00132243	1.66518e-05	0.0255363	2.88069e-05	0.000726176	0.000376394	0.417523	0.00477285	0.491182	0.091776	99.5088
L08	0.0238134	0.00430205	0.000164008	7.17197e-05	0.0318734	0.00554219	0.00020643	2.96044e-05	0.0560572	0.00994557	0.655097	0.0645251	99.3449	0.0645251	57.2462	0.217038	42.7538	0.217038	0.0106497	0.00205039	3.81392e-05	5.42346e-06	0.00567278	0.000888267	1.42195e-05	1.62146e-06	0.0163748	0.00294246	0.322878	0.0348007	99.6771	0.0348007	34.8056	0.83967	65.1944	0.83967	0.377593	0.00133147	0.00288198	1.58121e-05	0.175129	0.00102928	0.00741351	0.00016148	0.563017	0.000124899	1.82863	0.0318953	98.1714
L09	0.00783686	0.000282452	0.00716871	0.000498941	0.00885173	0.000376118	0.00467599	0.000238708	0.0285333	0.00139622	41.4983	0.554587	58.5017	0.554587	47.4143	0.165358	52.5857	0.165358	0.00470465	0.000377298	0.00312053	6.67283e-05	0.00258012	4.50423e-05	0.00105428	1.32636e-05	0.0114596	0.00038572	36.4436	0.760111	63.5564	0.760111	31.7415	1.57719	68.2585	1.57719	0.11758	0.00137501	0.0832961	0.000853915	0.0494674	0.00049425	0.0366577	3.75438e-05	0.287001	0.00177222	41.7954	0.0525271	58.2046
L11	0.0136503	0.0024319	2.67434e-05	8.94532e-06	0.013268	0.00205557	9.0915e-05	1.72258e-05	0.027036	0.00451364	0.433148	0.0244875	99.5669	0.0244875	49.461	0.59069	50.539	0.59069	0.0085241	0.00327808	5.4334e-05	4.75543e-05	0.00564032	0.00372302	0	0	0.0142188	0.00704866	0.341149	0.16533	99.6589	0.16533	37.826	7.43244	62.174	7.43244	0.462688	0.00293222	0.0026112	8.04398e-05	0.13895	0.000222626	0.00475733	0.000248319	0.609006	0.00282608	1.21007	0.0595982	98.7899
L13	0.0281823	0.00582505	0.000215969	2.42682e-05	0.0294237	0.00311636	0.000180206	3.2163e-05	0.0580022	0.00899784	0.683717	0.00877292	99.3163	0.00877292	51.2347	2.51973	48.7653	2.51973	0.0227338	0.00184475	0.000106312	5.21763e-05	0.0117256	0.000991033	4.86249e-05	7.53586e-06	0.0346143	0.00279115	0.454285	0.165597	99.5457	0.165597	34.0097	0.142454	65.9903	0.142454	0.457246	0.00535462	0.00221267	9.52392e-05	0.139389	0.00138411	0.00442214	0.000291921	0.60327	0.00693541	1.09969	0.0199601	98.9003
M01	0.00680774	6.28094e-05	0.0147151	0.000244504	0.00801271	1.75604e-05	0.0147142	0.000133035	0.0442497	0.000457908	66.5064	0.164973	33.4936	0.164973	51.3615	0.191173	48.6385	0.191173	0.0043761	7.99182e-05	0.005419	0.00030836	0.00322297	7.32566e-05	0.00322144	0.000198251	0.0162395	0.000513272	53.1835	1.43868	46.8165	1.43868	39.6912	0.484803	60.3088	0.484803	0.146166	0.002959	0.138006	9.09517e-05	0.100725	0.000500767	0.113923	0.00123396	0.498819	0.00460278	50.5061	0.236894	49.4939
M02	0.00853161	0.00132215	0.0160585	0.00256887	0.00849215	0.000998409	0.0152423	0.00207095	0.0483246	0.00696037	64.7522	0.274853	35.2478	0.274853	49.1672	0.730182	50.8328	0.730182	0.00524232	0.00101773	0.0075535	0.00124303	0.00418132	0.000935366	0.00555042	0.00125194	0.0225276	0.00444806	58.2097	0.418305	41.7903	0.418305	43.0805	1.20322	56.9195	1.20322	0.168539	0.00056284	0.181535	0.000715415	0.0921646	0.00184634	0.12436	0.000661131	0.566599	0.00378573	53.9883	0.117774	46.0117
M03	0.00898397	0.00134123	0.0138799	0.00217411	0.0148813	0.00217314	0.00743481	0.00134157	0.0451799	0.00703005	47.1426	0.446058	52.8574	0.446058	49.3864	0.0947621	50.6136	0.0947621	0.00639966	0.0021881	0.00788854	0.00280529	0.00405235	0.00117095	0.00265818	0.00076375	0.0209987	0.0069281	50.1512	0.450109	49.8488	0.450109	32.1889	1.40664	67.8111	1.40664	0.227559	0.000314692	0.223255	0.000689683	0.117229	0.000330252	0.114604	0.000653301	0.682646	0.000681326	49.4925	0.0440672	50.5075
M04	0.00132545	5.95912e-05	0.00496788	0.000167538	0.00213244	0.000145766	0.00572913	0.000308547	0.0141549	0.000681442	75.5777	0.275048	24.4223	0.275048	55.5267	0.536427	44.4733	0.536427	0.00159624	7.25851e-05	0.00200376	0.000472971	0.00129501	0.000207008	0.00135595	0.000217702	0.00625095	0.000825096	53.4837	3.98949	46.5163	3.98949	42.3292	1.20707	57.6708	1.20707	0.153804	0.00106453	0.165332	0.000588336	0.184519	0.00235124	0.196391	0.00160444	0.700047	0.00443187	51.6718	0.181978	48.3282
M05	0.019946	0.00290139	6.58733e-05	1.53951e-05	0.0216408	0.00133042	0.00012396	2.25066e-06	0.0417767	0.00421416	0.458864	0.0885254	99.5411	0.0885254	52.2032	2.08671	47.7968	2.08671	0.0105632	0.000201708	3.95318e-05	1.4197e-05	0.00628282	3.39678e-06	0	0	0.0168855	0.000212508	0.233606	0.0811381	99.7664	0.0811381	37.2114	0.488431	62.7886	0.488431	0.258137	0.00039031	0.00307302	4.79918e-05	0.0688147	0.00144788	0.00965617	0.000207333	0.339681	0.00199753	3.74733	0.0248725	96.2527
M07	0.0337899	0.00190244	0.000213373	7.34526e-05	0.00519654	4.58254e-05	3.57555e-05	3.83809e-06	0.0392356	0.00201788	0.631228	0.144963	99.3688	0.144963	13.3505	0.579599	86.6495	0.579599	0.0161698	0.00376385	8.53768e-05	4.41598e-05	0.00149935	0.000355985	0	0	0.0177545	0.00407567	0.523207	0.36883	99.4768	0.36883	8.43704	0.0682569	91.563	0.0682569	0.791499	0.00637262	0.0347238	0.000568368	0.118821	0.000592326	0.015314	0.00019242	0.960359	0.00734089	5.21033	0.000680676	94.7897
M08	0.0124477	0.00120504	4.92928e-05	1.14303e-05	0.00999136	0.000924626	6.99062e-05	2.49539e-07	0.0225582	0.00214085	0.528434	0.000585978	99.4716	0.000585978	44.6078	0.135681	55.3922	0.135681	0.0085387	0.00132024	2.79274e-05	7.6901e-06	0.0045685	0.000200196	0	0	0.0131351	0.00152812	0.210636	0.0340409	99.7894	0.0340409	34.9285	2.53941	65.0715	2.53941	0.601002	0.00178396	0.00236606	5.39647e-05	0.311729	0.0014796	0.00865709	0.000120282	0.923754	0.00319724	1.19332	0.0113094	98.8067
O01	0.196978	0.194326	0.000292423	0.000314511	0.0704014	0.0640185	0.000224836	0.000197712	0.267897	0.258857	0.188881	0.00869417	99.8111	0.00869417	27.7253	2.81924	72.2747	2.81924	0.0207059	0.0138371	8.94454e-05	2.08895e-05	0.00782612	0.00504364	0	0	0.0286215	0.0189016	0.368843	0.170598	99.6312	0.170598	27.5275	0.557303	72.4725	0.557303	0.400403	0.00961655	0.00119185	1.11922e-05	0.0808957	0.00269134	0.00059447	0.00027081	0.483085	0.0125675	0.369198	0.0441368	99.6308
O07	0.0368426	0.0049408	0.000145974	2.78644e-05	0.00270112	0.000301769	3.41629e-05	4.34276e-06	0.0397238	0.00526609	0.453534	0.000911034	99.5465	0.000911034	6.89673	0.165548	93.1033	0.165548	0.0137595	0.0076175	4.19438e-05	1.46823e-05	0.000996528	9.46654e-05	0	0	0.014798	0.00772685	0.298189	0.0564831	99.7018	0.0564831	7.60378	3.33064	92.3962	3.33064	1.30845	0.0264857	0.00347904	0.000110813	0.0567654	0.00155402	0.000809523	0.00018295	1.36951	0.0281119	0.313159	0.00116084	99.6868
O08	0.0587087	0.000597249	0.000205981	3.71976e-05	0.00269572	0.000173702	0	0	0.0616104	0.000733753	0.334713	0.0643618	99.6653	0.0643618	4.37406	0.229843	95.6259	0.229843	0.0310211	0.00242746	8.49314e-05	1.48301e-06	0.00132464	0.000158594	0	0	0.0324307	0.00258754	0.262539	0.0163743	99.7375	0.0163743	4.078	0.163655	95.922	0.163655	1.08292	0.0157265	0.0031432	1.69634e-05	0.0627289	0.000889316	0.00057817	8.87269e-05	1.14937	0.0167215	0.323741	0.00448556	99.6763
O14	0.0484067	0.00383772	0.000166728	3.5017e-05	0.000775655	6.4348e-05	3.10929e-05	3.19203e-06	0.0493801	0.00394028	0.39879	0.0455559	99.6012	0.0455559	1.63349	0.00643149	98.3665	0.00643149	0.0240417	0.00157771	6.45792e-05	1.02267e-05	0.000377716	8.04953e-05	0	0	0.024484	0.00166843	0.262949	0.0238507	99.7371	0.0238507	1.53507	0.224162	98.4649	0.224162	0.735535	0.00729974	0.00186063	5.39145e-05	0.00820786	0.00011195	0	0	0.745603	0.0074656	0.249523	0.00473255	99.7505
O16	0.0581401	0.00404256	0.000148961	5.08936e-05	0.00110531	8.85118e-05	0	0	0.0593944	0.00418196	0.2484	0.0681977	99.7516	0.0681977	1.86033	0.0180378	98.1397	0.0180378	0.0660451	0.0383904	0.000173754	9.45247e-05	0.00101869	0.000481033	0	0	0.0672376	0.038966	0.261614	0.0110294	99.7384	0.0110294	1.57169	0.195412	98.4283	0.195412	0.840634	0.0177367	0.00221547	5.31965e-05	0.0175144	0.000646991	0.000303178	0.000108697	0.860667	0.0182218	0.292904	0.0250115	99.7071
O17	0.0555782	0.000664766	0.00017054	3.45187e-05	0.002612	7.72351e-05	3.21157e-05	7.36032e-06	0.0583928	0.00062941	0.34669	0.0679826	99.6533	0.0679826	4.52907	0.168481	95.4709	0.168481	0.0425165	0.0483098	0.000108329	0.000108579	0.00170953	0.00193838	0	0	0.0443343	0.0503568	0.296552	0.0919269	99.7034	0.0919269	3.86819	0.0214789	96.1318	0.0214789	0.678316	0.000885461	0.00193372	4.07738e-05	0.0351718	7.94332e-05	0.00045959	9.0945e-05	0.715881	0.00109661	0.334303	0.0178874	99.6657
P05	0.00282844	0.000313315	0	0	0.0168941	0.00134773	7.55797e-05	3.20486e-05	0.0197982	0.0016931	0.376205	0.129704	99.6238	0.129704	85.7291	0.362128	14.2709	0.362128	0.0128114	0.000975291	3.88326e-05	3.80375e-06	0.0583833	0.00905214	0.000209058	1.65046e-05	0.0714426	0.0100401	0.349178	0.0312937	99.6508	0.0312937	81.9303	1.17959	18.0697	1.17959	0.267164	0.00460092	0.000895335	9.75031e-05	0.823427	0.00347903	0.00514981	0.000142219	1.09664	0.00831967	0.551178	0.0176783	99.4488
P07	0.00335695	0.000181267	1.89226e-05	2.40829e-06	0.0204776	0.0011145	0.000113587	3.38884e-06	0.0239671	0.00130156	0.553042	0.00584576	99.447	0.00584576	85.9146	0.00143997	14.0854	0.00143997	0.0100983	0.00640327	3.61355e-05	1.66798e-05	0.0368274	0.0174616	0.000123504	5.42598e-05	0.0470853	0.0239358	0.345374	0.0249091	99.6546	0.0249091	79.2625	3.0928	20.7375	3.0928	0.705591	0.00108667	0.00252168	0.000112865	1.99747	0.00734211	0.00924378	0.000153903	2.71483	0.00869554	0.433364	0.00843827	99.5666
P08	0.00441611	0.000529761	2.97304e-05	9.85777e-06	0.0108147	0.00115625	5.95839e-05	2.06773e-05	0.0153202	0.00167519	0.590376	0.135178	99.4096	0.135178	70.9997	0.351227	29.0003	0.351227	0.0159846	0.00157013	5.04978e-05	5.1574e-06	0.0319955	0.00121145	0.000111586	2.95e-06	0.0481422	0.00278379	0.337109	0.0149079	99.6629	0.0149079	66.7311	1.3484	33.2689	1.3484	0.277876	0.00510405	0.000651674	5.86998e-05	0.494262	0.00431295	0.00530806	0.000159649	0.778098	0.00951795	0.765915	0.00360492	99.2341
P09	0.00105905	1.85898e-05	0	0	0.00804988	2.96748e-05	0	0	0.00910893	4.82646e-05	0	0	100	0	88.3738	0.142481	11.6262	0.142481	0.00262814	0.000707015	6.64876e-06	2.32879e-06	0.0118446	0.00132245	3.3914e-05	3.89387e-06	0.0145133	0.0020279	0.283002	0.0503266	99.717	0.0503266	82.0116	2.37408	17.9884	2.37408	0.309007	0.000820918	0.000941215	0.000199751	0.969232	0.0107992	0.00543978	7.27831e-05	1.28462	0.0113476	0.496835	0.0256039	99.5032
P11	0.00264785	6.01143e-05	1.88629e-05	4.50656e-06	0.00675039	3.58645e-05	6.825e-05	4.05065e-07	0.00948535	2.01483e-05	0.918442	0.0451913	99.0816	0.0451913	71.8865	0.526532	28.1135	0.526532	0.0159694	0.000831418	4.08669e-05	1.47583e-05	0.0348274	0.00101186	0.000130655	4.64958e-06	0.0509683	0.00186269	0.336054	0.0257968	99.6639	0.0257968	68.5972	0.51255	31.4028	0.51255	0.431857	0.0048292	0.00113892	0.000120579	0.69242	0.00258818	0.0113124	0.000384093	1.13673	0.00792205	1.09524	0.036764	98.9048
P12	0.00365974	2.04786e-06	2.21712e-05	2.99873e-06	0.0278789	0.000443042	0.000132979	7.88405e-06	0.0316937	0.000451877	0.489335	0.0273605	99.5107	0.0273605	88.3817	0.162649	11.6183	0.162649	0.00257251	9.72403e-05	2.08084e-05	6.17119e-06	0.0183272	0.00121572	7.45988e-05	8.80538e-06	0.0209951	0.00113346	0.45316	0.0468689	99.5468	0.0468689	87.6182	1.10222	12.3818	1.10222	0.545646	0.00400253	0.0019261	5.36146e-05	1.65163	0.00490566	0.0105746	6.54176e-05	2.20978	0.00891999	0.565705	0.0017494	99.4343
Q01	0.151287	0.0189368	0.000416638	3.21218e-05	0.00855416	0.0015802	5.51363e-05	5.60442e-06	0.160313	0.0205547	0.295201	0.0143167	99.7048	0.0143167	5.35087	0.303123	94.6491	0.303123	0.25729	0.071509	0.000502523	0.000119686	0.0147287	0.00367629	7.2524e-05	2.53254e-05	0.272594	0.0753303	0.211687	0.00530204	99.7883	0.00530204	5.45024	0.148234	94.5498	0.148234	3.76181	0.0317928	0.00969316	0.000197405	0.118438	0.00069008	0.00242986	0.000200343	3.89237	0.0310998	0.311466	0.00256407	99.6885
Q05	0.228051	0.0210855	0.000603206	5.37834e-07	0.00784526	0.00158905	7.60308e-05	1.09047e-05	0.236576	0.022686	0.288205	0.0228001	99.7118	0.0228001	3.3312	0.356858	96.6688	0.356858	0.134991	0.111287	0.000294747	0.000208487	0.00509003	0.00351655	4.15479e-05	2.59613e-05	0.140417	0.115038	0.257526	0.0440138	99.7425	0.0440138	3.94499	0.709111	96.055	0.709111	3.46846	0.0259581	0.00869637	0.000240707	0.0886298	0.00172035	0.0016207	0.000218771	3.56741	0.0281379	0.289162	0.0105991	99.7108
Q06	0.289534	0.0611901	0.000805193	0.000137568	0.0195247	0.00361916	0.000138649	2.27354e-05	0.310002	0.0649696	0.305759	0.01237	99.6942	0.01237	6.35953	0.15802	93.6405	0.15802	0.201618	0.0364132	0.000384208	8.98467e-05	0.0142257	0.00402952	6.57466e-05	8.68429e-06	0.216294	0.0405412	0.207403	0.00667938	99.7926	0.00667938	6.54747	0.63977	93.4525	0.63977	2.71299	0.00795722	0.00745355	0.000201189	0.0902924	0.000964449	0.00177316	0.000365857	2.81251	0.00715744	0.328053	0.00502002	99.6719
Q08	0.572248	0.261214	0.00145296	0.000528349	0.0421912	0.0156858	0.000225758	0.000134432	0.616118	0.277563	0.276271	0.0168871	99.7237	0.0168871	7.01837	0.594061	92.9816	0.594061	0.235399	0.230889	0.000482782	0.000426577	0.018019	0.0132837	6.11642e-05	5.17028e-05	0.253962	0.244651	0.230364	0.0335908	99.7696	0.0335908	8.56359	2.99868	91.4364	2.99868	2.49998	0.0814939	0.00699092	7.18611e-05	0.144061	0.00435489	0.00233337	4.33091e-05	2.65337	0.0858774	0.35158	0.010303	99.6484
Q11	0.352522	0.120738	0.000914327	0.000215545	0.0207839	0.00666155	0.000197312	7.41864e-05	0.374418	0.127541	0.308358	0.0672843	99.6916	0.0672843	5.63073	0.158677	94.3693	0.158677	0.318371	0.161259	0.000633661	0.000326741	0.0198655	0.0113185	0.000103156	3.16978e-05	0.338973	0.172936	0.218879	0.00592397	99.7811	0.00592397	5.79033	0.394308	94.2097	0.394308	2.1464	0.0423473	0.00563508	3.95105e-05	0.0884278	0.00217581	0.0026839	7.5343e-05	2.24314	0.044638	0.370885	0.00226032	99.6291
R01	0.0495472	0.000444941	0.093229	0.00191056	0.00185759	0.000103261	0.00198739	9.23702e-05	0.146621	0.00255114	64.9384	0.236165	35.0616	0.236165	2.62162	0.0878114	97.3784	0.0878114	0.0491512	0.0107134	0.0961282	0.0222407	0.00170417	6.77876e-05	0.00180507	5.72527e-05	0.148789	0.0329646	65.7833	0.334877	34.2167	0.334877	2.41708	0.528431	97.5829	0.528431	1.37931	0.0166486	2.63863	0.00926027	0.0409932	0.000235977	0.04516	0.000280566	4.10409	0.0259534	65.3936	0.181064	34.6064
R06	0.00335478	0.000217192	0.0637944	0.00446646	0.000240902	4.22401e-05	0.00255573	0.000238704	0.0699459	0.00496459	94.8595	0.00604715	5.14046	0.00604715	3.99409	0.118168	96.0059	0.118168	0.0091701	0.00153241	0.124171	0.0112168	0.000170508	1.80112e-06	0.00208682	0.000224606	0.135599	0.0125228	93.1344	0.494726	6.86557	0.494726	1.67958	0.322081	98.3204	0.322081	0.173444	0.000932327	3.4174	0.0237065	0.00503165	0.000196689	0.0849391	0.000623397	3.68081	0.0254589	95.1512	0.00286466	4.84882
R09	0.0253908	0.00404005	0.0505366	0.00827777	0.00117258	0.000188693	0.0013522	0.000142287	0.0784521	0.0126488	66.1351	0.0698021	33.8649	0.0698021	3.22617	0.098266	96.7738	0.098266	0.106752	0.0147319	0.217145	0.0217598	0.00261273	0.000238243	0.00235728	0.000374353	0.328868	0.0358791	66.7877	0.783708	33.2123	0.783708	1.53052	0.353252	98.4695	0.353252	1.02047	0.00552676	1.99788	0.00301649	0.0208512	0.00062117	0.0245348	0.000116469	3.06374	0.00803855	66.0114	0.0709395	33.9886
R10	0.00964388	0.00193303	0.0310468	0.00674509	0.0267316	0.00304003	0.0558542	0.0077955	0.123276	0.0195136	70.4418	0.644755	29.5582	0.644755	67.1378	1.83774	32.8622	1.83774	0.0103874	0.00017361	0.0265518	0.00252083	0.0159721	0.00192972	0.027415	0.0038721	0.0803263	0.00849626	67.1391	0.857276	32.8609	0.857276	53.9333	1.51819	46.0667	1.51819	0.15852	0.000976066	0.442735	0.00446675	0.21299	4.56541e-05	0.372536	0.00313272	1.18678	0.00862119	68.6954	0.141316	31.3046
R11	0.0854061	0.00950068	0.000376302	1.026e-05	0.00296532	0.00027874	7.91512e-05	2.51948e-05	0.0888269	0.00976448	0.516789	0.0736225	99.4832	0.0736225	3.43247	0.0918839	96.5675	0.0918839	0.0717118	0.00907993	0.00250413	0.00223656	0.00123679	6.79448e-05	0.000372356	3.16482e-05	0.0758251	0.00687967	3.94552	3.34935	96.0545	3.34935	2.12878	0.145277	97.8712	0.145277	2.84029	0.0251693	0.0483426	0.000455419	0.0454491	0.000619479	0.00205924	7.73634e-05	2.93614	0.0261668	1.71661	0.0024225	98.2834
R17	0.0468177	0.00134085	0.0980479	0.00162511	0.00580699	0.000144601	0.00723338	0.000474854	0.157906	0.0023465	66.6754	0.262361	33.3246	0.262361	8.26214	0.51507	91.7379	0.51507	0.0484216	4.84065e-05	0.103909	0.00243926	0.00540034	0.000867234	0.0059289	0.00114522	0.16366	0.00450012	67.1088	0.344927	32.8912	0.344927	6.90815	1.0397	93.0919	1.0397	1.28701	0.00374694	2.71099	0.00103718	0.0624331	1.40054e-05	0.0778058	0.00105169	4.13824	0.00582181	67.3909	0.0443304	32.6091
S04	0.0640309	0.00319008	0.000177155	1.5694e-05	0.00108308	5.15015e-05	0	0	0.0652911	0.00322589	0.272257	0.0374885	99.7277	0.0374885	1.65892	0.00308377	98.3411	0.00308377	0.057866	0.0117742	0.000143452	1.85315e-05	0.000689096	0.00013134	0	0	0.0586985	0.011924	0.246262	0.0184551	99.7537	0.0184551	1.17548	0.0150347	98.8245	0.0150347	3.33374	0.0061845	0.00921621	9.55959e-05	0.0425978	0.000643261	0	0	3.38555	0.00692336	0.272219	0.00226696	99.7278
S07	0.0481519	0.000796148	0.000156437	1.81157e-05	0.00068405	1.23363e-05	0	0	0.0489924	0.000765696	0.319638	0.0419721	99.6804	0.0419721	1.39661	0.0470074	98.6034	0.0470074	0.141366	0.0249944	0.000286049	3.49401e-05	0.00149354	0.00015186	6.38315e-05	6.57799e-06	0.143209	0.0251878	0.245563	0.0141986	99.7544	0.0141986	1.09468	0.0818991	98.9053	0.0818991	6.13015	0.0766184	0.0162613	0.000259861	0.0542934	0.000940184	0.00110602	7.5074e-05	6.20181	0.0778935	0.280024	0.00188355	99.72
S08	0.0309746	0.00491981	9.00085e-05	1.51889e-05	0.000402811	5.03819e-05	0	0	0.0314674	0.00495501	0.293476	0.094481	99.7065	0.094481	1.28339	0.041981	98.7166	0.041981	0.0662049	0.0188891	0.000143842	2.65538e-05	0.00069634	0.000202733	3.95258e-05	1.07636e-05	0.0670846	0.0191291	0.276655	0.0232605	99.7233	0.0232605	1.09611	0.00569573	98.9039	0.00569573	1.9629	0.00371808	0.00588978	0.000215817	0.0153796	0.000210537	0.000548302	0.000285339	1.98472	0.00343803	0.324386	0.0040648	99.6756
T02	0.0194766	0.000482671	0.0310052	0.000273425	0.000235917	6.46897e-06	0.000201181	1.9941e-05	0.0509189	0.000195775	61.2879	0.811784	38.7121	0.811784	0.858478	0.0297585	99.1415	0.0297585	0.0124099	0.000501349	0.0183197	6.35664e-05	0.000135595	1.67774e-05	0.00010421	1.7066e-05	0.0309694	0.000564627	59.4991	0.934623	40.5009	0.934623	0.774465	0.0150518	99.2255	0.0150518	0.430564	0.00619826	0.550696	0.0082239	0.0030543	0.0003049	0.00256247	1.02754e-05	0.986877	0.014107	56.0613	0.0309122	43.9387
T03	0.00178924	0.00014653	0.0401155	0.0019969	0	0	0.000300671	3.059e-05	0.0422054	0.00217402	95.764	0.128984	4.23604	0.128984	0.711477	0.0358303	99.2885	0.0358303	0.00378862	0.000580201	0.0629514	0.00873265	0	0	0.000346462	3.55705e-05	0.0670865	0.00934843	94.3581	0.0786654	5.64189	0.0786654	0.517774	0.0191293	99.4822	0.0191293	0.0354951	0.000535826	0.781476	0.00768801	0	0	0.00426129	6.86894e-05	0.821232	0.00815515	95.6779	0.0223269	4.32206
T07	0.00267434	0.000218947	0.0563484	0.00644047	0	0	0.000428183	5.86243e-05	0.0594509	0.00671804	95.4936	0.140943	4.50637	0.140943	0.719249	0.0173334	99.2808	0.0173334	0.00139436	5.58878e-05	0.0258823	0.00125248	0	0	0.00016229	1.95089e-05	0.0274389	0.00132787	94.9173	0.0422906	5.0827	0.0422906	0.590429	0.0425264	99.4096	0.0425264	0.0635265	0.00554588	1.30952	0.0130326	0	0	0.00698985	0.000121658	1.38004	0.0187001	95.399	0.33952	4.60095
T09	0.00296035	0.000244854	0.0634466	0.0044832	0	0	0.000507577	4.12655e-05	0.0669146	0.00476932	95.5777	0.0507235	4.42227	0.0507235	0.758274	0.0076231	99.2417	0.0076231	0.00205731	0.000480251	0.0310988	0.00754469	0	0	0.000206506	5.5723e-05	0.0333626	0.00808067	93.8267	0.0557188	6.17326	0.0557188	0.616841	0.0176188	99.3832	0.0176188	0.0238903	0.000113662	0.446403	0.0019887	0	0	0.00211506	0.00015528	0.472408	0.00171976	94.9428	0.0424703	5.05721
T11	0.00243658	0.000150731	0.0530348	0.00417228	0	0	0.000423737	3.51861e-05	0.0558951	0.00435819	95.6381	0.0704363	4.36194	0.0704363	0.757942	0.00385284	99.2421	0.00385284	0.00159706	8.43313e-06	0.0184225	0.00151192	0	0	0.000120352	9.40595e-06	0.0201399	0.00151289	92.0462	0.639356	7.95384	0.639356	0.597509	0.0018188	99.4025	0.0018188	0.0600264	0.000379011	1.25933	0.00677826	0	0	0.00575894	1.91864e-05	1.32512	0.00713808	95.4701	0.00420072	4.52987
U02	0.546585	0.445585	0.000994611	0.000526585	0.0219275	0.0138366	8.84133e-05	2.90303e-05	0.569595	0.459919	0.229778	0.0981812	99.7702	0.0981812	4.28257	1.03386	95.7174	1.03386	0.336894	0.0171288	0.000734529	1.84517e-05	0.0115036	0.00107668	0.000205553	1.65892e-06	0.349338	0.0182223	0.269345	0.00924264	99.7307	0.00924264	3.34834	0.133075	96.6517	0.133075	1.07915	0.0310333	0.00283727	0.000139884	0.0319797	0.000157605	0.00152134	7.64443e-05	1.11549	0.0314072	0.390618	0.0083951	99.6094
U05	0.346427	0.147928	0.000934538	0.000325305	0.0163801	0.0091503	0.000138714	4.1493e-05	0.36388	0.157445	0.301347	0.0295862	99.6987	0.0295862	4.40552	0.619853	95.5945	0.619853	0.382734	0.0192842	0.000627859	4.29735e-05	0.0119889	0.00148273	0.000286808	4.38381e-06	0.395638	0.0208143	0.231193	0.000193065	99.7688	0.000193065	3.09715	0.21294	96.9028	0.21294	1.81048	0.073442	0.0046992	0.000171179	0.057192	0.00273383	0.002055	0.000249809	1.87442	0.0765968	0.360176	0.00774129	99.6398
U06	0.446868	0.0704271	0.000911292	0.00041587	0.0167671	0.00241754	0.000140155	3.92577e-05	0.464687	0.0732998	0.221298	0.0630353	99.7787	0.0630353	3.64204	0.0457958	96.358	0.0457958	0.385087	0.27824	0.000804815	0.00048721	0.0135086	0.0075785	0.000322372	0.000111148	0.399723	0.286417	0.307232	0.0704501	99.6928	0.0704501	3.72794	0.747464	96.2721	0.747464	1.6825	0.0371786	0.00438759	9.39219e-05	0.0514352	0.000954281	0.00132197	0.000136496	1.73965	0.0380904	0.328307	0.00963572	99.6717
U08	0.266235	0.0606946	0.00111856	0.000790958	0.0134386	0.00300282	0	0	0.280792	0.0644883	0.375926	0.195351	99.6241	0.195351	4.78947	0.0305686	95.2105	0.0305686	0.233257	0.215446	0.000623682	0.000387396	0.00850823	0.00829394	7.2904e-05	1.83103e-05	0.242462	0.224146	0.366609	0.171587	99.6334	0.171587	3.41288	0.273205	96.5871	0.273205	1.43215	0.00777765	0.00381756	8.25798e-05	0.0421656	0.000468385	0.00441392	0.000216226	1.48255	0.00701045	0.555279	0.0227806	99.4447
U09	0.230092	0.124709	0.000652094	0.000283152	0.0110362	0.00955123	0	0	0.241781	0.134544	0.280559	0.0390113	99.7194	0.0390113	4.10028	1.66869	95.8997	1.66869	0.502277	0.131802	0.00101936	0.000261688	0.0219476	0.00344364	0.000273248	1.24242e-05	0.525518	0.135519	0.247472	0.0116574	99.7525	0.0116574	4.28609	0.44764	95.7139	0.44764	1.46286	0.0267591	0.00332644	9.74325e-05	0.0496574	0.00093315	0.0018264	0.000292163	1.51767	0.0274975	0.339695	0.0189856	99.6603
U10	0.28845	0.195881	0.000738956	0.000482918	0.0142913	0.00799816	0.000126466	5.24654e-05	0.303607	0.204415	0.291828	0.0201432	99.7082	0.0201432	4.98636	0.705595	95.0136	0.705595	0.268634	0.0722704	0.000637005	8.98778e-05	0.0102381	0.00328613	0.000283506	2.59128e-05	0.279793	0.0756723	0.335678	0.0494026	99.6643	0.0494026	3.73709	0.173022	96.2629	0.173022	1.45543	0.028365	0.00387317	0.000104168	0.0450139	0.000440272	0.001345	9.34296e-05	1.50566	0.028816	0.346627	0.00592068	99.6534
U11	0.251006	0.0430965	0.000669523	9.54368e-05	0.0106339	0.00349198	0.000135733	5.01114e-05	0.262445	0.0467341	0.306754	0.000834272	99.6932	0.000834272	4.04758	0.628891	95.9524	0.628891	0.384844	0.108697	0.000800527	0.00014219	0.0125963	0.0062172	0.000399147	4.63965e-05	0.39864	0.115103	0.306906	0.0413081	99.6931	0.0413081	3.16505	0.657372	96.835	0.657372	1.52368	0.00406664	0.00364751	4.4869e-05	0.0430336	0.000977662	0.00143169	0.000184024	1.5718	0.00518346	0.323133	0.00778761	99.6769
X02	3.22737e-05	1.16895e-05	0.0030652	0.000234418	0.000833577	6.28147e-05	0.0134819	0.00118121	0.017413	0.00146675	95.0223	0.125687	4.97774	0.125687	82.2024	0.220055	17.7976	0.220055	0.000307023	0.000102077	0.00390656	9.26488e-05	0.00111312	4.47518e-05	0.0156009	0.00177739	0.0209276	0.00153791	93.1698	1.20353	6.83017	1.20353	79.7771	2.41659	20.2229	2.41659	0.00682269	0.000201638	0.0606483	0.00059022	0.0131442	0.000143936	0.233779	0.000596346	0.314394	0.000840991	93.6489	0.126906	6.35109
X09	0.000213016	7.31329e-05	0.00586904	0.000451087	0.00102765	0.000163241	0.0167556	0.00181344	0.0238653	0.0025009	94.8249	0.448138	5.17513	0.448138	74.4901	0.47667	25.5099	0.47667	0.000898005	0.000374967	0.0151254	0.00309823	0.00210576	0.000315588	0.0294825	0.00915798	0.0476117	0.0121968	93.4606	1.79994	6.53943	1.79994	65.9614	3.00005	34.0386	3.00005	0.0155397	0.000327168	0.203262	0.00673569	0.020584	0.00122526	0.358368	0.00714757	0.597754	0.0154357	93.9581	0.103691	6.0419
X10	0.000143864	8.95455e-06	0.0034287	2.27757e-05	0.00227168	2.16424e-05	0.0372472	0.000396866	0.0430914	0.000404688	94.3945	0.0183612	5.60553	0.0183612	91.7088	0.10994	8.29118	0.10994	0.000441608	4.24943e-05	0.00425346	0.00095564	0.00222524	0.000383743	0.0318085	0.00126337	0.0387288	0.000733972	93.1232	0.970245	6.87678	0.970245	87.8525	2.58801	12.1475	2.58801	0.00188338	0.000816698	0.0234783	3.40587e-05	0.00391183	0.000258099	0.103032	0.00024105	0.132305	0.000351607	95.6204	0.410565	4.37963
[truncated: 5 more columns]
